# Supplementary material for: Reduced Immunogenicity of Induced Pluripotent Stem Cells Derived from Sertoli Cells
Source: PubMed Central journal article supplement (PMC4148392; doi:10.1371/journal.pone.0106110), 2014-08-28
Supplement: pone.0106110.s004.pdf [file pone.0106110.s004.pdf]

## Supporting Information 2

**Table S1:** Primers of qRT-PCR and RT-PCR

Primer sequences for qRT-PCR

| Gene           | Primer Sequence               | Reference | Gene    | Primer Sequence            | Reference |
|----------------|-------------------------------|-----------|---------|----------------------------|-----------|
| Oct4           | F-TCTTTCCACCAGGCCCGGCTC       | [1]       | CD4     | F- CAAGCGCCTAAGAGAGATGG    |           |
|                | R-TGCGGGCGGACATGGGGAGATCC     |           |         | R- CACCTGTGCAAGAAGCAGAG    |           |
| Nanog          | F-CAGGTGTTTGAGGGTAGCTC        | [1]       | CD8b    | F- GATGGTCTTTGGGACAGGG     | [2]       |
|                | R-CGGTTCATCATGGTACAGTC        |           |         | R- ATGCCAGCAGAAGCAGGAT     |           |
| Nestin         | F-AGAGTCAGATCGCTCAGATCC       |           | CD11c   | F- CTGGATAGCCTTTCTTCTGCT   | [3]       |
|                | R-GCAGAGTCCTGTATGTAGCCAC      |           |         | R- GCACACTGTGTCCGAACTC     |           |
| Fik1           | F-CTTCTGGCTCCTTCTTGTCATTG     |           | B220    | F- AAGAGTTGTGAGGCTGGCAC    |           |
|                | R-TCATTGGCCCGCTTAACG          |           |         | R- GCTCAAACCTTCTGGCCTTG    |           |
| MHC $\alpha$   | F-CATGGCATCACTCTTCTCTACCTATGC |           | Mac1    | F- GTTTGTGAAGGCATTTCCC     |           |
|                | R-TACCACTGACACCGGTATCA        |           |         | R- ATTCGGTGATCCCTTGATT     |           |
| AFP            | F-TCAGCGAGGAGAAATGGTCC        |           | Gr1     | F- TGCCCTTCTCTGATGGATT     | [4]       |
|                | R-ATGAAAATGTCGGCCATTCC        |           |         | R- TGCTCTTGACTTTGCTTCTGTGA |           |
| $\beta$ -actin | F-CACCAGTTCGCCATGGATG         |           | Zg16    | F- CATCACCGCCTTCCGTAT      | [5]       |
|                | R-GCCGTTGTGACGACCAG           |           |         | R- CGTTGAAACTTGTGCCTGA     |           |
| CD3            | F-TCGTCACTGTCTAGAGGGCA        |           | Hormad1 | F- CCAGATTACCAACCACCAG     | [5]       |
|                | R-CCTCCTAGCTGTTGGCACTT        |           |         | R- TGAAAAGGTGTTGGGACT      |           |

Primer sequences for RT-PCR

| Gene           | Primer Sequence             | Reference | Gene  | Primer Sequence             | Reference |
|----------------|-----------------------------|-----------|-------|-----------------------------|-----------|
| Dazl1          | F- GCACTCAGTCTTCATCAGCAAC   | [6]       | Rex1  | F- CAGCAGCTCCTGCACACAGA     |           |
|                | R- CTATCTTCTGCACATCCACGTC   |           |       | R- GATCCGCAAACACCTGCTTT     |           |
| Vasa           | F- CTTGCAGAGATGTTTCAGCAGAC  | [6]       | Rex3  | F- GAGCGGAGCAGGTCTGAGAA     |           |
|                | R- CTCCAAGAGCTTGCTCTCTCTC   |           |       | R- GACTCCATTACTCCTGGGCCT    |           |
| Hsd3 $\beta$ 6 | F- TGGACAAGTTCTTCAGACCAGA   |           | Dppa4 | F- CATTGGGGGTAGGAACACGGAAGG |           |
|                | R- TCTCCTTCCAACACTGTCACC    |           |       | R- TGCCCCAAGTGTGTTTCATAA    |           |
| Gata4          | F- CCCTACCCAGCCTACATGG      | [7]       | GAPDH | F- GGGGTGAGGCCGGTGTCTGAGTAT |           |
|                | R- GAGCTGGCCTGCGATGTCTGAGTG |           |       | R- CATTGGGGGTAGGAACACGGAAGG |           |
| Sox2           | F- TAGAGCTAGACTCCGGGCGATGA  | [1]       |       |                             |           |
|                | R- TTGCCTTAAACAAGACCACGAAA  |           |       |                             |           |

All primer sequences are 5'→3', F: forward primers, R: reverse primers.

## References

1. Takahashi K, Yamanaka S (2006) Induction of pluripotent stem cells from mouse embryonic and adult fibroblast cultures by defined factors. *Cell* 126: 663-676.
2. Rui J, Liu H, Zhu X, Cui Y, Liu X (2012) Epigenetic silencing of CD8 genes by ThPOK-mediated deacetylation during CD4 T cell differentiation. *J Immunol* 189: 1380-1390.
3. Shaul ME, Bennett G, Strissel KJ, Greenberg AS, Obin MS (2010) Dynamic, M2-like remodeling phenotypes of CD11c<sup>+</sup> adipose tissue macrophages during high-fat diet-induced obesity in mice. *Diabetes* 59: 1171-1181.
4. Doloff JC, Waxman DJ (2012) VEGF receptor inhibitors block the ability of metronomically dosed cyclophosphamide to activate innate immunity-induced tumor regression. *Cancer Res* 72: 1103-1115.
5. Zhao T, Zhang ZN, Rong Z, Xu Y (2011) Immunogenicity of induced pluripotent stem cells. *Nature* 474: 212-215.
6. Ko K, Tapia N, Wu G, Kim JB, Bravo MJ, et al. (2009) Induction of pluripotency in adult unipotent germline stem cells. *Cell Stem Cell* 5: 87-96.
7. Kyronlahti A, Euler R, Bielinska M, Schoeller EL, Moley KH, et al. (2011) GATA4 regulates Sertoli cell function and fertility in adult male mice. *Mol Cell Endocrinol* 333: 85-95.
